# Supplementary material for: Factors associated with the availability and affordability of essential cardiovascular disease medicines in low- and middle-income countries: A systematic review
Source: PLOS Glob Public Health. 2022 Mar 23;2(3):e0000072. doi: 10.1371/journal.pgph.0000072 (PMC10021589; doi:10.1371/journal.pgph.0000072)
Supplement: S3 Table — (XLSX) [file pgph.0000072.s004.xlsx]

## Sheet: Sheet1
Item	Study 1	Study 2	Study 3	Study 4	Study 5	Study 6	Study 7	Study 8	Study 9	Study 10	Study 11	Study 12	Study 13	Study 14	Study 15	Study 16	Study 17	Study 18	Study 19	Study 20	Study 21	Study 22	Study 23	Study 24	Study 25	Study 26	Study 27	Study 28	Study 29	Study 30	Study 31	Study 32	Study 33	Study 34	Study 35	Study 36	Study 37	Study 38	Study 39	Study 40	Study 41	Study 42	Study 43
First Author	Adinan	Albelbeisi	Armstrong-Hough	Ashigbie	Bazargani	Bintabara	Bintabara	Cameron	Cepuch	Contreras-Loya	Duong	Ekenna	Emmerick	Fang	Fernandopulle	Ibrahim	Jigjidsuren	Kasonde	Katende	Khanal	Kibirige	Leão Tavares	Mendes	Minaei	Musinguzi	Mutale	Oliveira	Oyekale	Paniz	Peck	Perlman	Reséndez	Restinia	Restrepo	Rockers	Rockers	Saeed	Su	Uzochukwu	Vialle-Valentin	Viana	Wirtz	Yang
Publication Year	2019	2020	2018	2020	2014	2020	2018	2011	2012	2013	2019	2020	2020	2013	2019	2020	2019	2019	2015	2019	2017	2016	2014	2019	2015	2018	2016	2017	2010	2014	2011	2000	2021	2020	2019	2018	2021	2017	2002	2015	2015	2018	2015
Study Title	Preparedness of health facilities in managing hypertension & diabetes mellitus in Kilimanjaro, Tanzania: a cross sectional study	Capacity of Palestinian primary health care system to prevent and control of non-communicable diseases in Gaza Strip, Palestine: A capacity assessment analysis based on adapted WHO-PEN tool	Disparities in availability of essential medicines to treat non-communicable diseases in Uganda: A Poisson analysis using the Service Availability and Readiness Assessment	Availability and prices of medicines for non-communicable diseases at health facilities and retail drug outlets in Kenya: cross-sectional survey in eight counties	Essential medicines are more available than other medicines around the globe	Readiness of health facilities for the outpatient management of non- communicable diseases in a low- resource setting: an example from a facility-based cross-sectional survey in Tanzania	Preparedness of lower-level health facilities and the associated factors for the outpatient primary care of hypertension: Evidence from Tanzanian national survey	Differences in the availability of medicines for chronic and acute conditions in the public and private sectors of developing countries	Availability of essential medicines for chronic disease vs. communicable disease in Kenya as an indicator of age-related inequities in access	Original: Abasto y surtimiento de medicamentos en unidades especializadas en la atención de enfermedades crónicas en México en 2012 Translated: Supply of medicines in units specialized in the care of chronic diseases in Mexico in 2012	Readiness, Availability and Utilization of Rural Vietnamese Health Facilities for Community Based Primary Care of Non-communicable Diseases: A Cross sectional Survey of 3 Provinces in Northern Vietnam	How ready is the system to deliver primary healthcare? Results of a primary health facility assessment in Enugu State, Nigeria	Hypertension and diabetes treatment affordability and government expenditures following changes in patient cost sharing in the “Farmácia popular” program in Brazil: an interrupted time series study	Access to affordable medicines after health reform: evidence from two cross-sectional surveys in Shaanxi Province, western China	Patient experiences of access to NCD medicines in Sri Lanka: Evidence of the success story towards universal coverage	Availability of Essential Medicines in a Country in Conflict: A Quantitative Insight from Yemen	Free and universal access to primary healthcare in Mongolia: the service availability and readiness assessment	Evaluating medicine prices, availability and affordability in Bangladesh using World Health Organisation and Health Action International methodology	Readiness of Ugandan health services for the management of outpatients with chronic diseases	Availability, Price, and Affordability of Essential Medicines to Manage Noncommunicable Diseases: A National Survey From Nepal	Access to medicines and diagnostic tests integral in the management of diabetes mellitus and cardiovascular diseases in Uganda: insights from the ACCODAD study	Free access to medicines for the treatment of chronic diseases in Brazil	Original Title: Disponibilidade de medicamentos nas unidades básicas de saúde e fatores relacionados: uma abordagem transversal Translation: Availability of medicines in primary health care facilities and related factors: a cross sectional approach	Country Pharmaceutical Situation on Access, Quality, and Rational Use of Medicines: An Evidence from a middle-income country	Capacity of Health Facilities to Manage Hypertension in Mukono and Buikwe Districts in Uganda: Challenges and Recommendations	Assessing capacity and readiness to manage NCDs in primary care setting: Gaps and opportunities based on adapted WHO PEN tool in Zambia	Access to medicines for chronic diseases in Brazil: a multidimensional approach	Assessment of primary health care facilities’ service readiness in Nigeria	Free access to hypertension and diabetes medicines among the elderly: a reality yet to be constructed	Preparedness of Tanzanian health facilities for outpatient primary care of hypertension and diabetes: a cross-sectional survey	Prescription for change: accessing medication in transitional Russia	Original: Disponibilidad de medicamentos esenciales en unidades de primer nivel de la Secretaría de Salud de Tamaulipas, México Translation: Availability of essential medicines in first level units of the Secretariat of Health of Tamaulipas, Mexico	The availability of antihypertensive drug in era of NHI: a study in the primary health care centre Jakarta-Indonesia	Medicines’ private costs among elderly and the impairment of family income in a medium-sized municipality in the state of São Paulo	Effect of Novartis Access on availability and price of non-communicable disease medicines in Kenya: a cluster-randomized controlled trial	Equity in access to non-communicable disease medicines: a cross-sectional study in Kenya	Access to Essential Cardiovascular Medicines in Pakistan: A National Survey on the Availability, Price, and Affordability, Using WHO/HAI Methodology	Availability, cost, and prescription patterns of antihypertensive medications in primary health care in China: a nationwide cross-sectional survey	Effect of the Bamako-Initiative drug revolving fund on availability and rational use of essential drugs in primary health care facilities in south-east Nigeria	Evidence on access to medicines for chronic diseases from household surveys in five low- and middle-income countries	Access to continued-use medication among older adults, Brazil	Access to medicines for asthma, diabetes and hypertension in eight counties of Kenya	Organizational barriers associated with the implementation of national essential medicines policy: A cross-sectional study of township hospitals in China
Language	English	English	English	English	English	English	English	English	English	Spanish	English	English	English	English	English	English	English	English	English	English	English	English	Portuguese	English	English	English	English	English	English	English	English	Spanish	English	English	English	English	English	English	English	English	English	English	English
Date of data collection	March - July 2017	September 2019 to December 2019	2013	September 2016	2003 - 2011	2014 - 2015	2014 - 2015	2003 - 2008	2012	2012	January - April 2014	July - December 2017	October 2006 - December 2012	September 2010 and April 2012	May 2018	November 2017 to February 2018	May - October 2017	Not specified	2012- 2013	2015	2017	2013 - 2014	2012	April to November 2018	2012	2017	2013 - 2014	2013 - 2014	2005	November 2012 - May 2013	1994, 1998, 2004	September - October 1998	2013 - 2015	October 2012 to April 2013	2016 - 2018	2016	September to December 2019	2016 - 2017	1999	2008 - 2010	2008	Not indicated	2011
City/Region and Country	Moshi District Council and Moshi Municipal Council, Kilimanjaro Region, Tanzania	Gaza strip	Uganda, 10 districts in the north, south, west, and east	Embu, Kakamega, Kwale, Makueni, Narok, Nyeri, Samburu, and West Pokot counties in Kenya	23 low- and middle-income countries	Tanzania	Tanzania	Forty low- and middle-income countries	Kenya, six provinces	Twenty states, Mexico	Three provinces in Northern Vietnam	Enugu state in Nigeria	Brazil	Shaanxi Province, China	Nine provinces across Sri Lanka	Three cities in Yemen: Aden, Lahij, and Abyan	Ulaanbaatar, Mongolia	Six regions of Bangladesh: Dhaka, Sylhet, Chittagong, Dinajpur, Khulna, and Barisal	Wakiso and Mpigi districts in Central Uganda	Nepal, the following six cities in the different regions: Kathmandu, Biratnagar, Janakpur, Pokhara, Nepalgunj, Dhangadi	All four regions of Uganda (central, western, eastern and northern)	Brazil	Brazil	The cities of Tehran, Mashhad, Tabriz, Yazd, and Zahedan in Iran	Mukono and Buikwe districts in Uganda	Three districts in Lusaka province of Zambia	Brazil	Two states from each of the six geopolitical zones in Nigeria	Brazil, South and Northeast regions	Northwestern Tanzania	38 Population Centers Across Russia	Tamaulipas, Mexico	Jakarta, Indonesia	Urban census sectors of Praia Grande, São Paulo, Brazil	Embu, Kakamega, Kwale, Makueni, Narok, Nyeri, Samburu, and West Pokot counties in Kenya	Embu, Kakamega, Kwale, Makueni, Narok, Nyeri, Samburu, and West Pokot counties in Kenya	Pakistan	China	Two areas in Enugu State, Southeast Nigeria	Ghana, Uganda, Kenya, Philippines, Jordan	Brazil	Eight counties, Kenya	Six provinces in eastern, middle, and western China
Study Design	Cross-sectional	Cross-sectional	Cross-sectional	Cross-sectional	Cross-sectional	Cross-sectional	Cross-sectional	Cross-sectional	Cross-sectional	Cross-sectional	Cross-sectional	Cross-sectional	Retrospective interrupted time series	Cross-sectional	Cross-sectional	Cross-sectional	Cross-sectional	Cross sectional	Cross-sectional	Cross-sectional	Cross-sectional	Cross-sectional	Cross sectional	Cross-sectional	Cross-sectional	Cross sectional	Cross-sectional	Cross-sectional	Cross-sectional	Cross-sectional	Cross-sectional	Cross-sectional	Cross-sectional	Cross-sectional	Cluster-randomized controlled trial	Cross-sectional	Cross-sectional	Cross-sectional	Cross-sectional	Cross-sectional	Cross-sectional	Cross-sectional	Cross-sectional
Study Setting	Health facilities of all levels, excluding those providing specialized services	Governmental primary health care centers (PHCs)	Health facilities (includes public, non-profit private, and for-profit private; it also includes health centers at different levels from II - IV, with level II providing the fewest services and level IV providing the most services outside hospitals; it also includes general hospitals).	Public and private non-profit health facilities	Public and private heath facilities	Health centers including dispensaries, clinics, health centers, and hospitals	Lower level health facilities including health centers, dispensaries, clinics	Medicine outlets at health facilities	Public and mission facilities	Medical specialties units of chronic disease. These are outpatient health facilities created by the government for the prevention and treatment of non-communicable diseases	Public commune health centers	Public primary healthcare centers (PHCs)	Private pharmacies contracted with Farmacia Popular	Public hospitals and private pharmacies	Households	Public and private health facilities	Public and private health facilities	Public hospitals, private retail pharmacies, and private clinics	Urban and rural health facilities - both public and private non-for profit	Public facilities and private retail pharmacies	Public and private hospitals, private pharmacies	Households	Basic Health Units	Pharmacies and pharmaceutical centers	Hospitals, health centers and private clinics/dispensaries	Primary health care facilities	Households	Primary healthcare facilities	Household	Public and non-profit health facilities	Households	Health centers, health units, warehouses	Primary healthcare centers	Households	Public and non-profit health facilities, households	Households and health facility	Public hospitals and private retail pharmacies	Primary health care facilities	Primary health care facilities	Households	Households	Households	Government-run township hospitals
Sample size	44 health facilities	52 PHCs	196 health facilities	137 health facilities	2290 health facilities	770 health facilities	725 health facilities	2779 medicine outlets	56 Facilities	30 health units	89 health facilities	60 PHCs	25,150 private pharmacies	50 public hospitals and 30 private pharmacies in 2010 72 public hospitals and 72 private pharmacies in 2012	1008 individuals	30 health facilities	146 health facilities	135 health facilities	28 Facilities	60 facilities	22 public hospitals, 23 private hospitals, 100 privately owned pharmacies	12,725 individuals	29,228 health units	30 public and 30 private pharmacies	126 health facilities	46 health facilities	12725 households	2,480 health facilities	2,460 individuals	24 health facilities	4215	67 facilities	Not provided	289 individuals	571 individuals at households 127 health facilities	639 individuals from 593 households	81 facilities	3362 primary health care facilities	33 primary health centers	1867 individuals	27,333 individuals	445 individuals	90 township hospitals within rural areas
Survey/data collection method used	Adapted WHO SARA Survey	Adapted version of the WHO Package of Essential NCD Interventions (PEN) tool	WHO SARA Survey	Own survey	WHO/HAI Survey	Tanzania Service Provision Assessment administered by Ministry of Health	Tanzania Service Provision Assessment administered by Ministry of Health	WHO/HAI Survey	WHO/HAI Survey	Own survey	Modified WHO SARA Survey	Modified WHO SARA Survey	Data was collected from the dispensing databases of the Farmacia Popular Information System	WHO/HAI Survey	Own community-based household survey	WHO/HAI Survey	Modified WHO SARA Survey	WHO/HAI Survey	WHO SARA survey (Adapted version)	WHO/HAI Survey	WHO/HAI Survey	National Brazilian Survey on Access, Use and Promotion of Rational Use of Medicines (PNAUM)	Brazilian survey performed as part of the evaluation of the National Program for Improving Primary Care Access and Quality (PMAQ)	WHO Operational package for assessing, monitoring and evaluating country pharmaceutical situations	Own survey	Adapted version of the WHO Package of Essential NCD Interventions (PEN) tool	National Survey on Access, Use and Promotion of Rational Use of Medicines (PNAUM)	Service Delivery Indicator (SDI) Survey - Word Bank	Baseline survey of the Project for the Expansion and Consolidation of the Family Health Program Strategy (PROSEF) for Brazil	Modified WHO SARA Survey	Russian Longitudinal Monitoring Survey	Own survey	Data was collected from reports of drug use/demand, the drug stock card, and the drug demand and supply book	Own survey	Own survey	Own survey	WHO/HAI Survey	China Patient-Centered Evaluative Assessment of Cardiac Events (PEACE) Million Persons Project (MPP) primary health-care survey	Own survey	WHO methodology to measure medicine access and use	Brazilian Household National Survey	Own survey	Own survey
Health System Interventions/Arrangements/Factors analyzed	1) Facility type: Hospital versus health center versus dispensary	1) Geographic region: The five governorates of Gaza strip which comprise North Gaza versus Gaza versus Deir Al Balah versus Khan-Yunis versus Rafah	1) Sector: Public versus private non-profit versus private for-profit 2) Facility type: General hospital versus health center (HC) at level II versus level III versus level IV 3) Geographic region: North versus east versus west versus Kampala (south) 4) Basic amenities score: Proportion of amenities available at facility (amenities defined as consultation room, adequate sanitation facilities, eme…	1) Sector: Public versus private non-profit versus private for-profit	1) Presence of drug on the National Essential Medicine List (NEML) 2) Country income level: Being a low-income country versus lower middle-income country versus upper middle-income country	1) Sector: Private versus public facility	1) Sector: Private versus public facility 2) Facility type: Being a health center versus a clinic or dispensary 3) Facility location: Rural versus urban facility 4) Presence of management meetings: Having routine management meetings at the facility as opposed to not having these meetings 5) External source of revenue: Having an external source of revenue from the government as opposed to having a…	1) Sector: Private versus public facility	1) Sector: Public facility versus a mission facility 2) Facility Location: Urban versus rural facility - This study defines urban as a town with more than 50,000 inhabitants and rural as a region at least 25 km from an urban area	1) Pharmacy operation outsourcing: Being a unit with an outsourced pharmacy, meaning the pharmacy is not operated by the State Health Service versus being a unit without an outsourced pharmacy, meaning the pharmacy is operated by the State Health Service	1) Geographic location: Red River delta, northern midlands, and mountainous region	1) Facility Location: Urban versus rural facility	1) Changes in cost-sharing through the Farmacia Popular Two changes in cost sharing as a component of the Farmacia Popular program known as "Aqui tem Farmacia Popular" or AFP as follows: 1) Baseline (AFP-I): In this phase, which was implemented in 2006, the Farmacia Popular program was expanded to private pharmacies contracted with the Ministry of Health. Subsequent to these changes, the governme…	1) National Essential Medicines Policy (NEMP) of China A policy that was announced in 2009 targeting medicine production, pricing, procurement, prescribing, and reimbursement. One key aspect of the policy is a zero mark up drug price policy, where essential medicines have to be sold at the procurement price plus a fixed distribution cost. The following are the elements of NEMP implemented in Shaa…	1) Sociodemographic factors: A) Sex	1) Geographic region: Aden versus Lahij versus Abyan 2) Facility sector: Public hospital versus private hospital versus private pharmacy versus public health center	1) Facility type: Public hospitals versus private outpatient clinics versus sanitoriums versus government-owned privately managed Family Health Centers (FHC) 2) City districts: The Khan-Uul district versus the Chingeltei district in Ulaanbaatar. The Khan-Uul district has more favorable living conditions with 55% of the population living comfortable apartments or homes, whereas in the Chingeltei d…	1) Presence of drug on the National Essential Medicine List (NEML) 2) Presence on the Global Core List versus Supplementary List: The Global Core List is list of 14 medicines included in the WHO/HAI survey and selected based on global disease burden. The supplementary list is a list of 47 additional medicines that were out together based on local disease burden. This list was created through a wo…	1) Facility Type: The following different facility types were compared: A. Hospitals and level IV Health Centers: Regional or district hospitals with a target population of between 100,000 - 2,000,000 offering specialty services and having MDs provide care B. Level III Health Centers: Subcounty health facilities with a target population of 30,000, a maternity unit, and having non-MD clinicians/mi…	1) Geographic region: Kathmandu (capital city), Biratnagar (Eastern Development Region), Janakpur (Central Development Region), Pokhara (Western Development Region), Nepalgunj (Mid-Western Development Region), and Dhangadi (Far- Western Development Region)	1) Sector: Private versus public ownership of the health facility	1) Sociodemographic factors: A) Sex B) Age C) Education D) Socioeconomic status E) Region of the country F) Having a health plan	1) Population of municipality: Population of the municipality where the health unit is located 2) Type of health unit: Classified as health center, health post, or other. In this classification, health centers have a higher profile with more infrastructure and resources 3) Being a health unit with a family health strategy component: The family health strategy component emphasizes community health…	1) Geographic region: Tehran versus Mashhad versus Tabriz versus Yazd versus Zahedan 2) Sector: Public versus private	1) Facility Type: A. Hospitals and level IV Health Centers (HCIV): Regional or district hospitals that provide a wide range of services B. Level III Health Centers (HCIII): County level health facilities that have a maternity ward and outpatient services C. Level II Health Centers (HCII): Parish or village level health facilities that provide basic outpatient services D. Private clinic or dispens…	1) Facility location: Being urban versus being rural/semi-rural	1) Type of pharmacy: A. Unified National Health System (SUS): Free public health service where medicines are available for free B. Popular Pharmacy Program: A public program aimed to scale up medicine access, where some medicines are provided for free and others are charged but provided at a subsidized price C. Private pharmacy	1) Geographic region: Being a southern state versus a northern state 2) Facility location: Being rural versus urban 3) Electricity: Having access to electricity 4) Generator: Having access to a generator as second source of electricity 5) Solar Panel: Having access to a solar panel as second source of electricity 6) Battery: Having access to a battery as second source of electricity 7) Source of …	1) Geographic region: Household being in the south region versus being in northeast region 2) Type of primary care unit (PCU): Household being in a coverage area with a traditional PCU or being in a coverage area with a PSF PCU as follows: A. The traditional PCU was established before 1994 and is the baseline type of PCU B. The Family Health Program (PSF) PCUs, which were established after 1994. …	1) Facility type: Hospital versus health center versus dispensary	1) Sociodemographic factors: A) Sex B) Age: Being 18-39 versus 40–59 versus 60 or older C) Education: Incomplete secondary education or less versus complete secondary education versus higher education D) Household consumer goods: Having a color television, video recorder, car, washing machine, dacha E) Alcohol consumption: None versus 1-3 times per month versus 1-3 times per week versus > 4 times…	1) Jurisdiction 2) Facility type: Urban health center versus dispersed rural heath center versus concentrated rural health centers versus auxiliary health units	1) Implementation of the National Health Insurance (NHI): This was a national plan that was implemented in in January 2014 and included the following key changes: A. Changes in payment from a fee for service model to a case-based model involving diagnosis-related groups, which limited the covered costs of treatments B. Requirement that primary healthcare centers order drugs on the national formul…	1) Sociodemographic factors: A. Sex B. Age: 60 - 69 versus 70 - 79 versus 80 or older C. Socioeconomic Status D. Education: ≤ 8 years versus > 8 years E. Chronic disease: Having chronic disease versus not having chronic disease F. Supplementary health insurance plan: Having a plan versus not having a plan 2) Type of facility where medicines are primarily purchased: Purchased at the Unified Nation…	1) Novartis access: A program by Novartis to provide medicines for non-communicable diseases to the Mission for Essential Drugs and Supplies (MEDS), which is a main distributor to public and non-profit health facilities, at a wholesale price of US $1 per treatment per month	1) Sociodemographic factors: A. Wealth level: Broken down by quintiles from low to high based on the household's assets	1) Sector: Private versus public facilities 2) Brand: Generic versus originator brand 3) Presence on national essential medicine list (NEML)	1) Facility type: A. Township health centers (THC): Higher level facilities located in rural areas B. Village clinics (VC): Lower level facilities located in rural areas C. Community health centers (CHC): Higher level facilities located in urban areas D. Community health stations (CHS): Lower level facilities located in urban areas 2) Presence on guidelines: Being present on the Chinese Guideline…	1) Bamako-Initiative (BI) revolving drug fund: The BI revolving drug fund is a mechanism within the BI which was meant to ensure a sustainable mechanism for maintaining medicine supplies A. Health centers in areas where BI was implemented B. Health centers in areas where BI was not implemented	1) Sociodemographic factors: A. Sex B. Age of individual with chronic disease is under 40 C. Age of individual with chronic disease is over 60 D. Large household: Having 9 or more members in the household E. Poor household: Being from 2 lower expenditure quintiles for country F. Education: Highest education in the household above secondary G. In capital: The household is in the capital city H. Pr…	1) Sociodemographic factors: A. Age: 60 - 64, versus 65 - 69, versus 70 - 74, versus 75 or older B. Sex C. Geographic region: North versus northeast versus southeast versus south versus midwest D. Household location: Urban versus rural E. Number of morbidities reported: None versus 1 versus 3-4 versus > 4 F. Income group: High versus middle versus low as described below: i. High (monthly family i…	1. Sociodemographic factors: A. Age: Years as a continuous variable B. Sex C. Household location: Being urban versus rural D. Education level: None versus some primary versus primary completed versus at least some secondary E. Number of residents within household: As a continuous variable F. Wealth level: z score G. Diagnosis location: Public versus private non-profit versus private for-profit H.…	1) Geographic region: Being in the eastern or central region versus western region 2) Occurrence of National Essential Medicine Policy (NEMP) training per health worker 3) Monthly remuneration of physicians 4) Number of outpatients per health worker 5) Number of inpatient separations per health worker 6) Public finance per health worker: Public finance/number of health workers 7) Medical revenue …
Methodology	Health facilities were selected at random from a sampling frame obtained from district authorities. The WHO SARA survey was used to assess the presence of medicines. The Chi-squared test was used to conduct statistical analysis	All PHCs in the five different governorates of Gaza were selected using a census sampling method. Interviews were conducted face to face at each of the facilities. Statistical analysis was performed using fisher's exact test.	The Ministry of Health of Uganda conducted a survey of health facilities across Uganda using the WHO Service Availability and Readiness Assessment (SARA) methodology to ascertain the presence of medicines, supplies, and equipment. A Poisson regression model was used for statistical analysis	Data was collected by trained data collectors. All health facilities that purchased medicines through the Mission for Essential Drugs and Supplies (MEDS), a non-profit wholesale vendor for medicines, were surveyed. Data on the price patients pay for medicines at each facility was collected from the staff a each health facility. Statistical analysis was performed using the two-sample t-test.	Data on availability was gathered from country-level surveys obtained from the WHO/HAI database, which provides data on the availability of medicines in the public and private sector. The NEML was obtained from the WHO for each of the countries involved in the study. If a country had multiple surveys, averages were calculated without weighting. Statistical analysis was performed using the Moods m…	The survey used a multi-stage cluster sampling technique. Visits were made to different facilities to collect information. Statistical analysis was performed using chi squared tests.	Data used for this study came from the 2014 - 2015 Tanzania Service Provision Assessment (TSPA) survey, which is administered by the ministry of health. The survey had multiple components, one of which was a facility-level survey. Data from facility level surveys for lower level facilities were use in the current study. The study looked specifically at facilities that provide hypertension service…	Data for this study was obtained from surveys conducted on drug prices and availability using the WHO-HAI methodology. For the purposes of this study, 15 medicines most frequently covered in WHO/HAI surveys for acute conditions and 15 medicines covered for chronic conditions were included in the analysis. The study does not provide any information on statistical methods	Multistage random sampling was used to selected public and mission health facilities in 6 provinces in Kenya was chosen. A survey on the availability and price of medicines was conducted at the facilities using an adapted version of the WHO-HAI methodology. Chi-squared analysis was used for statistically analysis.	The pharmacy of thirty health units were selected using simple random sampling and visited by the study team. A questionnaire was used and respondents were asked to document the existence of specific drugs provided on a list. The pharmacy manager was asked to also provide input on the existence of medicines. Exit interviews were also conducted with patients to determine whether patients had to sp…	Provinces were divided according to geographic region. The province in each region that had the highest weighted composite score of prevalence of alcohol and tobacco use were selected, because these are risk factor for NCDs. In each province, two districts (one urban and one peri-urban) were selected using convenience sampling. All the CHCs within a district received a mail in questionnaire. Thre…	The PHCs were selected using simple random sampling from a sampling frame in the seven different health districts. Interviews were conducted with the most senior member at each health facility. Statistical analysis was performed using the T-test.	Data from the Farmacia Popular information system was reviewed retrospectively. The following data points were collected: 1) Patient identifier, 2) price paid by patient, 3) date of purchase, 4) prescribed daily dose, and 5) amount procured. Interrupted times series segmented linear regression models were used to statistically analyze the impact of the implementations of each of the phases on the…	Two cross sectional surveys were conducted in September 2010 and April 2012. The surveys were conducted using the WHO-HAI methodology. Data was collected during on site visits to the facilities. Generalized estimating equations were used to test differences in the availability of medicines included in the survey with the facility specified as a random effect.	A community-based household survey was used to survey adults aged 50 years and older who had a physician confirmed diagnosis of hypertension, ischemic heart disease, diabetes mellitus, asthma, or chronic obstructive airway disease for at least 5 years. First, one district was selected at random in each of nine provinces in Sri Lanka and two districts were selected in the Western Province because …	The main public hospital in each city was selected and four other public health facilities were selected using convenience sampling. The study does not indicate how private health facilities were selected. Three pharmacists were trained and visited each of the facilities for data collection. Statistical analysis was performed using chi-square tests.	Two districts in Ulaanbaatar were purposely selected as they were target districts for an Asian Development Bank project. Teams of researchers visited the health facilities and obtained data by interviewing personnel. Field supervisors cross-checked the collected data. Chi-square tests were used to compare categorical variables.	In each of the regions, the main tertiary hospital was included in the analysis as well as a district or specialty hospital. Four public health facilities within a three hour drive from the main tertiary hospital were selected at random. Private facilities that were within a 5 km distance of each of the public health facilities were selected randomly. Availability was determined at each facility …	A total of 28 facilities were sampled. The sampling was stratified by geographical area and type of health facility. Data was collected by a team of clinicians. Findings were summarized as proportions and Fisher's exact test was used for statistical analysis.	The study does not state what method of sampling was employed. In each city, 2 data collectors visited health facilities and collected data on the availability of medicines. Supervisors made appointments with health facilities before the data collectors visited each facility. The study does not state what kind of statistical analysis was used.	As part of the Access to Cardiovascular diseases, Chronic Obstructive pulmonary disease, Diabetes mellitus and Asthma Drugs and diagnostics (ACCODAD) 22 public hospitals, 23 private hospitals, and 100 private pharmacies were selected using random sampling in the four different regions of Uganda. Data was collected using a pretested questionnaire based on the WHO and HAI methods. Proportions were …	Data for this study was from the National Survey on Access, Use and Promotion of Rational Use of Medicines (PNAUM). This was a household survey of individuals of all ages living in private permanent homes in urban areas of Brazil. Data was collected using face-to-face interviews. Individuals wo reported taking medicines for a chronic disease were asked if they were able to obtain the medicines fo…	Data from a database containing information from about 30,000 basic health units across Brazil was used. This database contained information on medicine availability at these health units. Linear by linear chis-squared and logistic regression were used for statistical analysis.	Initially the cities of Tehran and Zahedan were selected because they are considered the most and least privileged cities in Iran, respectively. Three additional cities of Masshad, Tabriz, and Yazd were selected based on clustered sampling techniques to cover different geographic regions. In the public sector, the largest outpatient pharmacies in the public sector were selected as were the smalle…	All level IV health centers and hospitals in the districts of interest were selected. Level II and level III health centers were selected at random. Data collection was performed by a team of research assistants who visited the facilities. Structured and un-structured interviews were conducted at each facility. Statistical analysis was performed using simple linear regression and paired t-tests.	The WHO PEN survey was adapted for this survey. All eligible primary health care facilities in the three districts were included in this study. These three districts and their healthcare facilities were previously part of a program known as the Better Health Outcomes through Mentorship and Assessment (BHOMA) health system strengthening intervention, which ended in 2015. This was a randomized inte…	This study was based on data collected from the National Survey on Access, Use and Promotion of Rational Use of Medicines (PNAUM). This was a household survey conducted in different regions of Brazil. For this study, data for adults aged 20 or older who reported having been diagnosed with a non-communicable disease was used. Percentages and 95% confidence intervals were calculated for each variab…	Data from the SDI survey were used for this study. Facilities were selected using multi-stage cluster sampling. Principal component analysis was used to develop indices for drug availability in relation to each of the independent variables (factors analyzed). Ordinary least square regression was used to determine what factors were associated with greater medicine availability.	Multistage sampling was used for this study and the PCU was considered the sampling unit. After the area covered by each PCU facility was identified, households were visited consecutively. Individuals age 65 or older who self-reported having diabetes or hypertension and who were able to participate were surveyed about their access to medicines and their access to free medicines. Specifically, ind…	In each of the towns, the main hospitals were purposefully included and urban and rural health centers were chosen at random. In rural areas, the nearest dispensary to each health center was also selected. The head of each facility was interviewed to examine drug supplies. Statistical analysis was performed using Fisher's exact tests.	Data was used from the Russian Longitudinal Monitoring Survey, which was a household survey of individuals. Districts were stratified according to socioeconomic criteria and selected using a probability proportional to size. Within each primary sampling unit, the first household was chosen randomly and the subsequent 9 were chosen at regular intervals. Respondents were asked questions about their…	Three state jurisdictions were selected (two at random and one being the jurisdiction with the state capital). All the first-level health units belong to the jurisdiction were then selected including the jurisdictional warehouses and the state warehouse. Facilities that were open on the days of the survey were visited in the three jurisdictions. The presence of a list of 56 medicines included in …	The reports of drug use/demand, the drug stock card, and the drug demand and supply book were reviewed and data was collected for before and after implementation of NHI. Statistical analysis was performed using T-tests and the Mann Whitney test for data with non-normal distribution.	Probabilistic cluster sampling was used in two stages. Face to face home interviews were conducted using structured questionnaires. The interviews were conducted by trained interviewers who worked in pairs. Elderly individuals in the household were asked to respond to questions about sociodemographic factors and the type of facility where they obtained their medicines. Statistical analysis was pe…	Eight counties were selected through convenience sampling were randomly assigned to the Novartis access program or to control. Within each county, all public and non-profit health facilities that were served by MEDS were enrolled. Households were also selected using a two stage sampling process. First, ten census enumeration areas were randomly selected in each county. In each enumeration area, t…	Ten villages were selected in each of the eight counties and 10 eligible households were selected at random in each village. A cross sectional survey was administered to households. Individuals within the households who were 18 years of age or older who, had been diagnosed with either CVD, diabetes, asthma, or breast cancer, and who had been prescribed medicines for these conditions were invited …	The largest public hospital was selected in each survey area and four hospitals within a 3 km area were selected at random. One private retail pharmacy was selected within 5 kms of each public facility. Data was collected on availability of medicines by trained data collectors. Statistical analysis was performed using binary and multivariate logistic regression.	Data from the MPP health survey were used. A network was established of various district-level regions in all 31 provinces in mainland China. The health facilities were enrolled according to residents of catchment area, population stability, and local economic conditions. For data collection, the list of medicines in stock at each heath facility was reviewed. Statistically analysis was performed …	All 33 primary health care centers in the two regions were selected. Twenty one were in the Oji River local government area where the Bamako-Initiative had been implemented and another 12 were in the Enugu East local government area where the Bamako initiative had not been implemented. Data was collected retrospectively and in a cross-sectional fashion through visits to the health facilities. At …	Household surveys developed by the WHO were used to determine medicine availability within households. A variety of factors including sociodemographic factors, available financing mechanisms, and opinions within the household were ascertained using a structured questionnaire from the person within the household who was determined to be most knowledgeable about the health issues of the household. …	Data from the Brazilian National Household Survey of 2008 was used for this cross-sectional study. Those above 60 years of age were included in the analysis if they reported using continued-use medications. The questions of interest for this study was weather individuals were able to obtain all of their continued-use medications for free the last time they needed these medications. Factors associ…	This study was part of the baseline evaluation for the Novartis Access Program. Using a two stage sampling process, eight counties were initially selected using purposive sampling. Within these counties, households were selected at random. Households were included in the analysis if at least one individual living in the household and aged 18 or older had been diagnosed and prescribed medicine for…	Multistage random sampling was used to select township hospitals. Six provinces were selected and within each province three counties were selected at random. Within each county, five township hospitals were selected at random. The questionnaire was developed by the research team. At each hospital, one individual was assigned to data collection. Statistical analysis was performed with ANOVA tests…
Medicines or medicine categories presented	One of the following three antihypertensive medicines: 1) Bendroflumethiazide 2) Hydrochlorothiazide 3) Spironolactone	The following CVD medicines: 1) Aspirin 2) Atenolol 3) Enalapril 4) Furosemide 5) Hydrochlorothiazide 6) Statins 7) Calcium channel blockers	Ten essential medicines for treating NCDs, of which four are CVD drugs: 1) Nifedipine 2) Enalapril or other ACE Inhibitor 3) Atenolol 4) Simvastatin	A list of 21 medicines for NCDs and acute disease including the following CVD drugs: 1) Amlodipine 2) Atenolol 3) Bisoprolol 4) Captopril 5) Furosemide 6) Hydrochlorothiazide 7) Ramipril 8) Simvastatin 9) Valsartan	A basket of medicines comprising a core list of medicines for the treatment of chronic or acute conditions globally as well as a supplementary list of medicines that were selected at the country level based on national health priorities. The following classes of CVD drugs were included: 1) Diuretics 2) Lipid modifying agents 3) Agents acting on the renin-angiotensin system	CVD drugs for the management of the following conditions: 1) Hypertension: Thiazide diuretics 2) Heart failure: ACE inhibitors, beta blockers, furosemide	The following four categories of anti-hypertensive drugs: 1) Angiotensin converting enzyme (ACE) inhibitors 2) Thiazide diuretics 3) Beta blockers 4) Calcium channel blockers	A basket of 15 medicines for chronic conditions including the following CVD drugs: 1) Captopril - ACE Inhibitor 2) Atenolol - Beta Blocker 3) Nifedipine - Calcium Channel Blocker 4) Hydrochlorothiazide - Diuretic 5) Losartan - ARB	A list of twelve medicines used to treat non-communicable diseases including the following CVD medicines: 1) Aspirin 2) Furosemide 3) Atenolol 4) Hydrochlorothiazide 5) Enalapril	A list of 17 basic medicines from the Universal Catalog of Health Services for the treatment of hypertension, diabetes, dyslipidemia, metabolic syndrome, obesity, and other conditions. The following cardiovascular disease drugs were included: 1) Captopril 2) Chlorthalidone 3) Enalapril 4) Furosemide 5) Irbesartan 6) Isosorbide 7) Losartan 8) Metoprolol 9) Nifedipine 10) Telmisartan 11) Propranolo…	Medicines for hypertension, myocardial infarction, or stroke	A list of essential medicines and commodities including the following CVD drugs: 1) ACE Inhibitors 2) Thiazide diuretics 3) Beta blockers 4) Calcium channel blockers 5) Aspirin 6) Furosemide 7) Statins 8) Spironolactone	The following six antihypertensive medications: 1) Atenolol 2) Propranolol 3) Hydrochlorothiazide 4) Captopril 5) Enalapril 6) Losartan	A group of 44 medicines were included in this study. Of those, 27 were from the WHO/HAI core global and regional lists. Another 17 were selected as supplementary to that list because they were locally important. The following CVD medicines were included in the list: 1) Amlodipine 2) Atenolol 3) Atorvastatin 4) Captopril 5) Digoxin 6) Enalapril 7) Hydrochlorothiazide 8) Lisinopril 9) Losartan 10) …	A list of 26 medicines included in the list of priority drugs to manage NCDs or drugs whose prices were regulated, including the following CVD medicines: 1) Aspirin 2) Atenolol 3) Atorvastatin 4) Enalapril 5) Furosemide 6) Hydrochlorothiazide 7) Nifedipine 8) Telmisartan 9) Amlodipine 10) Clopidogrel 11) Diltiazem 12) Losartan + hydrochlorothiazide 13) Losartan 14) Rosuvastatin	The following CVD drugs: 1) Aspirin 2) Clopidogrel 3) Propranolol 4) Hydrochlorothiazide 5) Nifedipine 6) Furosemide 7) Digoxin 8) Atorvastatin 9) Simvastatin 10) Methyldopa	Thirteen key medicines for treating acute and chronic conditions including the following CVD drugs: 1) Captopril 2) Simvastatin 3) Atenolol	A total of 61 medicines, of which 14 were from the WHO/HAI Global Core List and 47 additional medicines that were determined base on the local disease burden. The following cardiovascular disease medicines were included. Global Core List 1) Bisoprolol 2) Captopril 3) Simvastatin Supplementary List 1) Amlodipine 2) Aspirin 3) Atorvastatin 4) Enalapril 5) Furosemide 6) Hydrochlorothiazide 7) Isosor…	First line therapy for hypertension defined as one of two thiazide diuretics (hydrochlorothiazide or bendrofluazide)	A list of 60 NCD medicines based on the WHO Package of Essential NCD Interventions (PEN), the WHO Essential Medicine List, and the Nepal Essential Medicine List that included drugs for CVD, diabetes, chronic respiratory disease, and medicines used for palliative care. The following CVD medicines were included: 1) Thiazide diuretics 2) Calcium channel blockers 3) Beta blockers 4) Angiotensin conve…	The following cardiovascular disease drugs: 1) ARBs: Losartan, Telmisartan 2) ACE inhibitors: Captopril 3) Thiazide diuretics: Bendrofluazide 4) ARB-Thiazide: Losartan-hydrochlorothiazide, telmisartan-hydrochlorothiazide 5) Loop diuretics: Furosemide 6) Calcium channel blockers: Nifedipine, amlodipine 7) Statins: Simvastatin, atorvastatin, rosuvastatin 8) Antiplatelet drugs: Aspirin, clopidogrel …	Medicines for the treatment of chronic diseases including the following classes of cardiovascular disease drugs as described in the study: 1) Cardiac therapy 2) Antihypertensives 3) Diuretics 4) Beta-blockers 5) Calcium channel blockers 6) Agents acting on the renin-angiotensin system 7) Lipid modifier agents	A subset of 56 key medicinal products from twelve different categories. Two categories included in this analysis were CVD drugs as follows: 1) Cardiology drugs 2) Antihypertensive drugs	A list of 25 key medicines developed based on medicines recommended by the WHO and based on expert opinion. The following CVD drugs were included: 1) Metoprolol 2) Losartan 3) Atorvastatin 4) Captopril	Antihypertensive medicines from the following categories: 1) Diuretics 2) Beta blockers 3) Alpha blockers 4) Mixed alpha and beta blockers 5) Calcium channel blockers 6) ACE Inhibitors 7) Angiotensin II receptor blockers	The following classes of CVD medicines: 1) Beta Blockers 2) Diuretics 3) ACE Inhibitors 4) Calcium channel blockers 5) Aspirin 6) Statins	Medicines for the following chronic diseases: 1) Hypertension 2) Cardiovascular disease 3) Chronic obstructive pulmonary disease 4) Diabetes 5) Arthritis 6) Depression	A list of 27 key medicines for acute and chronic conditions which included the antihypertensive drug, nifedipine, in the CVD drug category	Continuous use medicines for diabetes and hypertension	First line therapy for hypertension	Any medicine prescribed by a physician in the 30 days prior to the survey for a chronic condition including heart, lung, liver, kidney, gastrointestinal, or spinal diseases	This study looked at two classes of medicines: 1) To examine differences in availability in different jurisdictions, the availability of a list of 56 medicines included in the Mexico Table of Medicines and deemed by the researchers as being essential were surveyed using a verification guide 2) To examine differences in availability in different types of health units, the availability of antihyper…	The following antihypertensive drugs: 1) Amlodipine 2) Hydrochlorothiazide 3) Captopril 4) Nifedipine	A basket of medicines used by the elderly including drugs from the following classes: 1) Gastrointestinal system and metabolism 2) Blood and hematopoietic organs 3) Cardiovascular system 4) Nervous system	Novartis Access portfolio of a list of drugs for NCDs including the following CVD medicines: 1) Furosemide 2) Amlodipine 3) Hydrochlorothiazide (HCTZ) 4) Bisoprolol 5) Valsartan 6) Ramipril 7) Simvastatin	Hydrochlorothiazide	The following CVD medicines: 1) Furosemide 2) Atenolol 3) Simvastatin 4) Amlodipine 5) Captopril 6) Enalapril 7) Nifedipine 8) Atorvastatin 9) Hydrochlorothiazide 10) Digoxin 11) Losartan 12) Propranolol 13) Methyldopa 14) Amiodarone 15) Bisoprolol 16) Lovastatin 17) Spironolactone 18) Aspirin	A list of 62 antihypertensive medicines from the China Patient-Centered Evaluative Assessment of Cardiac Events (PEACE) Million Persons Project (MPP) from the following four classes: 1) ACE Inhibitors or ARBs 2) Beta blockers 2) Calcium channel blockers 3) Diuretics	Two categories of drugs were examined: 1) All drugs that were available at each of the surveyed facilities 2) A list of marker drugs that were on the Ministry of Health essential medicine list. This list of 13 drugs included aspirin as the only CVD drug	Any medicines for the following chronic diseases: 1) Hypertension 2) Heart disease 3) Diabetes 4) Asthma 5) HIV 6) Arthritis 7) Epilepsy 8) Chronic stomach pain 9) Stroke consequence 10) High cholesterol 11) Cancer 12) Tuberculosis 13) Liver disease 14) Depression 15) Other	Continued-use medications for 12 conditions including hypertension, heart disease, and chronic kidney disease	Medicines for hypertension	All drugs on the national essential medicine list All drugs on the provincial essential medicine list
Outcome Measures	Medicine availability at health facility	Medicine availability at health facility	Medicine availability at health facility	Medicine affordability	Medicine availability at health facility	Availability	Health facility preparedness: Preparedness was rated as an index. The index score was calculated by examining the following three domains as suggested by the Service Availability and Readiness Assessment (SARA) survey of the WHO: 1) Staff and guidelines 2) Diagnostic equipment 3) Availability of each of the four categories of antihypertensives mentioned above Each of the three domains contained a…	Medicine availability at health facility	Medicine availability at health facility	Medicine availability at health facility Medicine affordability	Medicine availability at health facility	Medicine availability at health facility	Medicine affordability	Medicine availability at health facility	Medicine availability at state sector health facility Medicine affordability at state sector health facility	Medicine availability	Medicine availability at health facility	Medicine availability at health facility	Medicine availability at health facility	Medicine availability at health facility	Medicine availability at health facility	Medicine Affordability	Medicine availability at health facility	Medicine availability at health facility	Medicine availability at health facility	Medicine availability at health facility	Medicine availability at health facility	Medicine availability at health facility	Medicine affordability	Medicine availability at health facility	Medicine affordability	Medicine availability at health facility	Availability	Affordability	Medicine availability at health facility Medicine availability at home	Medicine availability at health facility Medicine availability at home	Availability at health facility	Medicine availability at health facility	Medicine availability at health facility	Access to medicine: This study looked at access to medicines. A household was considered to have access if the following two criteria were met: 1) An individual in the household with a chronic condition was prescribed an medicine from an appropriate therapeutic class for the chronic condition and the individual took the medicine regularly 2) A medicine form the same therapeutic class was found in…	Medicine affordability	Medicine availability at home	Medicine availability at health facility
Additional information on how availability/affordability are defined	Availability: The presence of unexpired versions of at least one of the three antihypertensive medicines as verified through observation by the research assistants	Availability: The presence of the medicine at the health facility on the day of the survey	Availability: Having the medicine in stock at the health facility on the day of the SARA survey	Affordability: Being able to obtain medicines for free	Availability: Does not provide any information, however, it states that all surveys were conducted in compliance with WHO/HAI methodology. Also, based on quantification of availability described below, it seems that they looked at the presence of the medicine on the day of the survey.	Availability: The presence of the drug at the facility as verified by direct observation	Availability: For each of the four categories of medicines studied, availability was defined as the facility reporting the drug as available	Availability: Does not provide any information, however, it states that all surveys were conducted in compliance with WHO/HAI methodology. Also, based on quantification of availability described below, it seems that they looked at the presence of the medicine on the day of the survey.	Availability: The presence of the drug at the facility on the day of the survey	Availability: The presence or existence of the drug at the facility on the day of the survey Affordability: Being able to obtain medicines for free	Availability: The study does not provide much information. It states that they measured availability of NCD-related medications using a modified version of the SARA survey.	Availability: The presence of the medicines at heath facilities.	Affordability: Paying zero co-payment for medicines versus having to pay a co-payment for medicines	Availability: The study states that data was collected on the availability of medicines during on site visits. It does not provide further information, however, they did use the WHO/HAI survey.	Availability: Individuals response to the question of whether all, some, or none of their NCD medicines were available at the most recent follow-up visit to the NCD clinic Affordability: Individuals response to the question of whether they were able to afford, were able to afford with difficulty, were unable to afford, or were unable to afford at all their medicines for NCDs at the most recent fo…	Availability: The physical presence of each medicine on the shelf as verified by direct observation	Availability: The study does not provide information.	Availability: The study does not provide information. It simply states that data collectors assessed availability.	Availability: Defined as having at least one of the two thiazide diuretics available and not expired at the health facility as determined by interviews with the heads of the facilities or their delegates.	Availability: The study states that they collected data on availability by surveying outlets.	Availability: It states that data was collected using pre-tested questionnaires but does not provide further information.	Affordability: Being able to obtain medicines for free	Availability: A drug was considered available when there was at least one unit of the drug present and verified by direct observation on the day of the survey at the health facility	Availability: The study says that data was collected from the pharmacy managers but does not provide further information.	Availability: Availability was defined in two ways: 1) The study states that data on availability was collected through questionnaires but does not provide further information. 2) A reported stock-out for the medicine in the three months preceding the survey at the facility	Availability: The study does not provide any information, just states that they collected data on availability.	Availability: A binary variable defined by whether the interviewed individual reported yes or no to the question of having been able to obtain all of their medicines at a specific considered source facility without problems with availability.	Availability: The study states that they collected data on the availability of non-expired versions of the drug but it does not provide further information.	Affordability: Individual reporting that they have received medicine for hypertension or diabetes for free. This was examined in two ways: A. Free access to the medicines anywhere B. Free access to the medicines at the PCU of the area	Availability: The study says that they interviewed the heads of facilities to collect information on drug supplies.	Affordability: Individual reporting an inability to afford medicines	Availability: A questionnaire was used to determine the existence of at least one copy of the specific type of medicine at the health facility on the day of the survey	The study does not define availability any further	Affordability: Was defined as income impairment. This was calculated by dividing the average amount spent on medicines by the family income per capita multiplied by 100. Thus, the higher the income impairment, the lower the affordability.	Availability: Having at least one copy of the medicine in stock at the facility or at the house on the day of an unannounced visit, as verified by direct observation, regardless of whether the drug was provided through Novartis Access	Availability: Having at least one copy of the medicine in stock at the facility or at the house on the day of an unannounced visit, as verified by direct observation	Availability: Presence of the medicine at health facility as verified by direct observation	Availability: Having a medicine or specific medication class present as determined by reviewing a list of medicines in stock at each health facility.	Availability was defined as: 1) The study states that they used retrospective and cross-sectional methods to collect data, including if the drug is available. However, it does not provide further information. 2) The estimated duration for which the stock of a marker drug would be adequate to cover its expected consumption (the higher the duration, the greater availability)	Availability: Medicine for a chronic disease prescribed by a physician that were found at home. The study does not provide further information on whether the presence of these medicines were confirmed through direct observation.	Affordability: Having to purchase all medicines versus obtaining all medicines for free	Availability: Having at least one kind of medicine at home for the treatment of hypertension as verified by direct observation	Availability: The medicine being in stock as determined through extraction of data from the administrative systems of the health facility.
Quantification of availability or affordability	The proportion of facilities where drugs of interest were available	The proportion of facilities where each medicine was available on the day of the survey	A count score of the number of NCD medicines (out of the total of 10) available at a health facility on the day of the survey	Affordability was quantified as the mean proportion of facilities providing medicines for free	The percentage of facilities where the medicine was available on the day of the survey	Availability was quantified as the percentage of facilities having a thiazide diuretic for hypertension or having at least one type of drug for heart failure	Availability was quantified as a component of facility preparedness. Preparedness was expressed as a binary variable. Facilities that scored greater than or equal to 50% on the preparedness index score were considered "prepared" and those that scored less than 50% were considered "not prepared"	The mean of the percentage of facilities at which each of the 15 drugs was present on the day of the survey.	Availability was quantified in two ways: 1) Collectively for all 12 NCD drugs, availability was measured as the sum of the availability scores at all facilities (the availability score at each facility is a number between 0 and 12 depending on how many of the 12 drugs were available at each facility) divided by the sum of all drugs that could have been available. For example, if there were 30 rur…	1) Availability was quantified in the following ways: A. The mean percentage of medicines available across different facilities B. The percentage of facilities that had all seventeen medicines available 2) Affordability was quantified as the percentage of people having to pay out of pocket for medicines because of stock outs	No information provided on how availability was quantified	The mean proportion of medicines and commodities available at health facilities	The average monthly payments made by patients for their antihypertensive drugs	The mean of the percentage of facilities where each drug was available	1) Availability was quantified as the percentage of individuals reporting all, some, and none of their medicines were available 2) Affordability was quantified as the percentage of individuals reporting they were able to afford, they were able to afford with difficulty, they were unable to afford, and they were unable to afford at all their medicines	The proportion of facilities where each medicine was available	The mean percentage of medicines available across different facilities	The mean percentage of medicines stocked across different facilities	The proportion of facilities where the medicine was available	The mean of the percentage of facilities where each drug was available	The proportion of facilities at which the drug of interest was available on the day of data collection.	The percentage of individuals who received all of their medicines for free	Availability was quantified in two different ways: 1) Average availability: The proportion of facilities that had all the drugs from a drug category available 2) Availability greater than 80%: The proportion of health units where greater than 80% of all key drugs from the twelve categories was available	The mean percentage of medicines available across different facilities	1) The percentage of facilities containing the drug of interest 2) The percentage of facilities reporting stock-outs in the three months preceding the survey	The percentage of facilities having the medicine of interest available	Percentage of individuals reporting that they were able to obtain the medicine	The percentage of health facilities that had non-expired versions of the drug of interest available on the day of the survey	Percentage of individuals who reported obtaining their medicines for free	The percentage of facilities having the medicine of interest available	Percentage of individuals who reported being unable to afford their medicines	Availability was quantified in two way: 1) For analysis of differences in availability in different jurisdictions, the median number of medicines available at health facilities in each jurisdiction was calculated 2) For analysis of differences in availability across health units, the proportion of surveyed health facilities where zero, one, two, or three of the three antihypertensive drugs were p…	The study does not provide any information on how availability was quantified	The mean income impairment in different subgroups	Proportion of facilities were the medicine was available Proportion of households were medicine was available	The probability that the household or health facility had the medicine available on the day of the survey, expressed as the proportion of facilities or households that had the medicine available	The mean of the percentage of facilities where the medicine of interest was present on the day of the survey	The proportion of health facilities where a specific medication or medication class was in stock	1) The mean number of essential medicines available at a health facility 2) The mean of the estimated duration for which the stock of a marker drug would be adequate to cover its expected consumption. This estimate was calculated based on average monthly consumption for each health unit for each drug.	The likelihood of having access to medicines	Percentage of individuals who reported having to purchase all medicines	The likelihood of having medicines available at home for hypertension	Mean number of drugs available across different health facilities
Findings	1) Facility Type: Antihypertensive medicines were available at 4/5 hospitals (80%), 6/12 health centers (50%), and 8/17 dispensaries (47.1%) a difference that was not statistically significant (p = 0.417)	1) Geographic region: There was no statistically significant difference in the availability of any CVD medicines in different governorates	Results from the multivariate model: 1) Sector: Private for-profit facilities had average medicine counts that were 98% higher than public facilities (p < 0.001) and private non-profit facilities had average medicine counts that were 47% higher than public facilities (p = 0.014) 2) Facility type: Being a general hospital (p = 0.004) or level IV health center (p = 0.002) was associated with signif…	1) Sector: A significantly greater proportion of public facilities (0.47) provided medicines for free than private non-profit facilities (0.09) (p < 0.0001)	1) Presence of drug on the National Essential Medicine List (NEML): A. All sectors combined: The overall median availability of medicines on the NEML (61.5%) and those not on the NEML (27.3%) were significantly different (p = 0.0000). The median availability among generics on the NEML (53.3%) and those not on the NEML (19.2%) was also significant (p = 0.0000). However, the median availability of …	1) Sector: A. Hypertension: The availability of a thiazide diuretic for hypertension was 28.5%, 16.3% and 11.1% at private hospitals, health centers, and dispensaries and 20.6%, 3.1% and 0.0% at public hospitals, health centers, and dispensaries, a difference that was statistically significant (p < 0.01) B. Heart failure: The availability of at least one agent for heart failure was 79.3%, 60.6% a…	After adjusting for confounders, the following factors were associated with significantly greater odds of facility preparedness for hypertension services: 1) Sector: Being a private sector facility as opposed to a public sector facility (Adjusted OR = 2.7, 95% CI: 1.2 - 6.1) 2) Facility type: Being a health center as opposed to a clinic or dispensary (Adjusted OR = 5.2, 95% CI: 3.1 - 8.7) 3) Faci…	1) Sector: Among 40 countries, 37 of which were low- or middle-income, the mean availability of 15 medicines for chronic conditions in the public sector was 41.6% (95% CI: 32.1–51.2) and was significantly lower than the mean availability of medicines for chronic conditions in the private sector, which was 69.2% (95% CI: 63.3–75.2)	1) Sector: Collectively for all 12 medicines used to treat NCDs, mean availability was 46.4% in mission facilities and 45.4% in public facilities, a difference that was not statistically significant (p = 0.953) 2) Facility Location: A. Collectively for all 12 medicines used to treat NCDs, mean availability was 51.3% in urban facilities and 40.6% in rural facilities, a difference that was consider…	1) Availability: A. The mean percentage of medicine availability was 82% in units with outsourced pharmacies and 78% in units with pharmacies operated by the State Health Service, a difference that was not statistically significant (p = 0.8) B. Among units with outsourced pharmacies, 2 of 11 had all medicines in stock (18%) and among units with State Health Service-operated pharmacies, 2 our 19 h…	1) Geographic location: The availability of CVD medicines was significantly lower in the mountainous region than in other regions (p = 0.005)	1) Facility Location: PHCs in urban areas had an average of 36 out of 102 medicines and commodities in stock while PHCs in rural areas had an average of 24 out of 102 in stock, a difference that was statistically significant (p = 0.004)	1) Changes in cost-sharing through the Farmacia Popular: Prior to the introduction of the SNP program in January of 2011, patients' mean out of pocket monthly payments for antihypertensive drugs was R$9.94 (Brazilian reais). Following the introduction of the SNP program in February 2011, patients' mean out of pocket payments for antihypertensives was reduced to zero. The level of change at the ti…	1. For all 44 drugs (includes all CVD drugs): A. All facilities: i. Overall there was a significant decrease in the availability of lowest-priced generics (LPG) from 25.5% in 2010 to 20.5% in 2012 (p < 0.0001) ii. Overall there was a non-significant decrease in the availability of originator brands (OB) from 9.3% in 2010 to 8.7% in 2012 (p = 0.4) B. Private pharmacies: i. There was a significant …	1) Availability: 57.6% of females and 59.1% of males stated that all their drugs were available 36.1% of females and 35.2% of males reported that some of their drugs were available 0% of females and 0.8% of males reported that none of their drugs were available There was no statistically significant difference in the rates of availability reported by males versus females (p = 0.494) 2) Affordabil…	1) Geographic region: There was no significant difference in the availability of any of the CVD drugs in the three cities 2) Facility sector: There were significant difference in the availability of the following medicines with availability levels as follows: A. Aspirin: 100% at public hospitals, 100% at private hospitals, 85% at private pharmacies, 0% at public health centers (p = 0.000) B. Clop…	1) Facility Type: The mean availability of medicines was 21.8% at FHCs, 13.1% at private outpatient clinics, 13.1% at sanitoriums, and 7.7% at public hospitals. This difference was not statistically significant (p = 0.130) 2) City District: The mean availability of medicines was 11.4% in the Chingeltei district and 18.4% in the Khan-Uul district. tis difference was not statistically significant (…	The following was assessed by comparing mean availability: 1) Sector: The mean availability of lowest price generics was 37% in public facilities, 63% in private retail pharmacies, and 54% in private clinics (p < 0.01) 2) Presence of drug on the National Essential Medicine List (NEML): Mean availability of medicines on the NEML was 50.3% while mean availability of medicines not on the NEML was 57…	1) Facility Type: First line therapy for HTN was available at 4/4 hospitals and level IV health centers, at 8/12 level III health centers, and at 1/12 level II health centers (p = 0.001)	1) Geographic region: There was no significant difference in the availability of medicines across the 6 regions surveyed (p < 0.05)	1) Sector: A. The availability of the following classes of drugs was significantly higher at private hospitals (PH) or private pharmacies (PP) as compared to public hospitals (PubH): ARBs: 87% at PH, 99% at PP, 31.8% at PubH (p < 0.001) ARB-thiazide diuretics: 78.3% at PH, 96% at PP, 27.3% at PubH (p < 0.001) Statins: 87% at PH, 98% at PP, 18.2% at PubH (p < 0.001) Warfarin - 65.2% at PH, 74.8% a…	1) Sociodemographic factors: A) Sex: A significantly greater proportion of men (51.4%) than women (45.3%) received all of their medicines for free (p < 0.001) B) Age: A significantly greater proportion of individuals aged 40 - 59 (51.1%) than those who were 60 or older (46%) and those who were 20 - 39 (41.2%) obtained all of their medicines for free (p = 0.001) C) Education: 47.5% of those with a…	The following were assessed using linear by linear chi squared tests and examined average availability: 1) Population of municipality: A significant difference was seen in the average availability of cardiology drugs in health units based on the population of the municipality (p = 0.0), however, this difference was not observed for antihypertensive drugs (p > 0.05) Population less than 10K: 54.4%…	1) Geographic region: There was no significant difference in the availability of key medicines in the different cities 2) Sector: There was no significant difference in the availability of key medicines in the public versus private facilities Data on availability are as follows: 1) Tehran: 96% in public facilities and 99% in private facilities 2) Zahedan: 96% in public facilities and 100% in priv…	1) Facility type: A. The availability (percentage of facilities containing the drug) of the all classes of antihypertensives significantly differed across different health facility types except for alpha blockers: i) Diuretics - Hospitals: 100%; HCIV: 100%; HCIII: 73.9%; HCII: 9.8%, Private: 44.2% (p < 0.001) ii) Beta blockers - Hospitals: 100%; HCIV: 75%; HCIII: 95.6%; HCII: 9.8%, Private: 97.6%…	1) Facility location: There was no significant difference in the availability of any CVD medicine classes in urban and rural areas except for calcium channel blockers, which were available at significantly higher rates in urban/semi-urban facilities: A. Beta Blockers: Available at 29% of rural facilities and 25% of urban/semi-urban facilities (p = 1.000) B. Diuretics: Available at 55% of rural fa…	1) Type of pharmacy: Total availability was significantly lower in the SUS pharmacy (45.2%; 95% CI: 42.2–48.2) than in the Popular Pharmacy Program, which was significantly lower (67.4%; 95% CI: 64.4 - 70.2) than the private pharmacy (88.5%; 95% CI: 87.3 - 89.6)	1) Geographic region: The indices of drug availability increased by 0.2615 percent for those states that are in southern Nigeria as compared to northern Nigeria. This difference was statistically significant (p < 0.05) 2) Facility location: The indices of drug availability increased by 0.1796 for rural facilities as compared to urban facilities. This difference was not statistically significant (…	1) Geographic region: The ability to obtain medicines for free overall was not significantly different between the South and Northeast, however, the ability to obtain medicines for free at the PCU of the area was significantly higher in the Northeast: A. Overall, 55.1% (95%CI: 51.0-59.2) of respondents in the South and 62.4% (95%CI: 58.2-66.5) of respondents in the Northeast reported obtaining th…	1) Facility type: 75% of hospitals (3/4), 25% of health centers (2/8), and 25% of dispensaries (3/12) had first line therapy available for hypertension. This difference in availability between hospitals and health centers/dispensaries was not statistically significant (p = 0.16)	1) Sociodemographic factors: A. Age-adjusted data on determinants of being unable to afford medicine for 1994, 1998, and 2004. The following determinants were associated with significant differences in the odds of not being able to afford medicines: i) Sex: Being female in the 1998 survey (OR: 1.44, 95% CI: 1.06 - 1.94) ii) Education: Having less than a secondary education in 2004 for men (OR: 2.…	1) Jurisdiction: The median number of drugs available from the list of 56 drugs was 34 (95% CI: 32.2-36.8) in Jurisdiction A, 32 (95% CI: 29.0-35.9) in Jurisdiction B, and 33 (95% CI: 31.0-35.9) in Jurisdiction C. This difference was not considered statistically significant (χ2= 2.91; p= 0.23) 2) Facility type: There was no significant difference (χ2= 6.23; p= 0.716) in the availability of antihy…	1) Implementation of the National Health Insurance (NHI): A. Amlodipine: There was a significant increase in the availability of amlodipine 5 mg tablets (p = 0.000) and amlodipine 10 mg tablets (p = 0.011) after the implementation of NHI. B. Hydrochlorothiazide: There was a significant decrease in the availability of hydrochlorothiazide 25 mg tablets (p = 0.000) after the implementation of NHI. C…	1) Sociodemographic factors: The following sociodemographic factors were associated with affordability of medicines: A. Education: Among individuals with ≤ 8 years of education, income impairment was 3 and in those with > 8 years of education, it was 6.5, suggesting that medicines are more affordable to those with lower education (p ≤ 0.01) B. Chronic disease: Among individuals with a chronic dis…	1) Novartis Access Program: A. Health facility: i. Availability for three CVD drugs assessed and adjusted odds ratios are expressed after controlling for baseline value of outcome, facility level, and public ownership. Based on these findings, Novartis Access significantly increased availability of amlodipine but not furosemide or HCTZ as follows: Amlodipine: 31% availability in control and 48% a…	1) Sociodemographic factors: A. Household wealth level and availability of HCTZ at home: The probability that HCTZ would be available at home was reported for the lowest and highest quintiles and is as follows: Q1 (Lowest wealth quintile): 61.3% Q5 (Highest wealth quintile): 79.4% There was a positive and statistically significant wealth gradient with regard to the probability of having medicine …	1) Sector: Mean availability of medicines was significantly lower at public facilities than at private facilities on logistic regression (p < 0.001) 2) Brand: Mean availability of generic medicines was significantly lower than originator brands (p < 0.001) 3) Presence on national essential medicine list (NEML): Medicines on the NEML were significantly more likely to be available than those on the…	1) Facility type: A. 89.7% of CHCs, 93.7% of THCs, 93.8% of CHSs, and 87.2% of VCs stocked at least one class of antihypertensives (Availability was significantly higher for THCs and CHSs than for VCs) B. 87.2% of CHCs, 85.6% of THCs, 85.3% of CHSs, and 69.6% of VCs stocked at least two classes of antihypertensives (Availability was significantly higher for CHCs, THCs and CHSs than for VCs) C. 78…	1) Bamako-Initiative (BI) revolving drug fund: A. The mean number of essential medicines at BI facilities was 35.4 and was significantly higher than the mean number of essential medicines at non-Bamako initiative facilities, where it was 15.3 (p < 0.05) B. The mean number of non essential medicines at BI facilities was 1.2 and was significantly lower than the mean number of non essential medicine…	1) Sociodemographic factors: Of the sociodemographic factors studied, the following were associated with significantly greater or lower odds of medicine access at home in the various countries: A. Age under 40: Lower odds in Ghana (OR: 0.27, 95% CI: 0.09, 0.80), Kenya (OR: 0.52, 95% CI: 0.28 - 0.98) and Jordan (OR: 0.37, 95% CI: 0.18.- 0.75) B. Large household: Lower odds in Kenya (OR: 0.92, 95% …	1) Sociodemographic factors: The following variables were associated with significantly greater or lower odds of purchasing all medicines as opposed to receiving all medicines for free in multivariate analysis: A. Age: Being aged 70 - 74 (aOR = 1.2; 95% CI: 1.1 - 1.3) or > 75 (aOR = 1.5; 95% CI: 1.4 - 1.6) as compared to age 60 - 64 or 65 - 69 B. Geographic region: Being from the southeast (aOR =…	1) Sociodemographic factors: The following sociodemographic factors were associated with significantly higher or lower odds of having medicines for hypertension available at home: A. Education level: As compared to individuals with no education, those with some primary education (OR: 2.25, 95% CI: 1.21–4.19) and those having completed a primary education (OR: 2.63; 95% CI: 1.24–5.59) had signific…	After controlling for confounders the following factors were significantly associated with medicine availability: 1) Geographic region: Being in the central region was positively associated with medicine availability (b = 0.433, p = 0.000) 2) Public health finance per health worker: Was negatively associated with medicine availability (b = - 0.236, p = 0.033)
